# Supplementary material for: First modern human settlement recorded in the Iberian hinterland occurred during Heinrich Stadial 2 within harsh environmental conditions
Source: Sci Rep. 2021 Jul 26;11:15161. doi: 10.1038/s41598-021-94408-w (PMC8313528; doi:10.1038/s41598-021-94408-w)
Supplement: Supplementary file 1 — Supplementary Dataset 1. [file 41598_2021_94408_MOESM1_ESM.xlsx]

## Sheet: AMS datings
Dataset 1 - Archaeological sites plotted in Map A of Figure 1 (42 - 38 ka cal BP)
Number	Site	Level	Lab.Code	C14 age	STD	Age cal BP (95,4%)	Technocomplex	References
1	Cueva del Conde	N20B	Beta-224303	34730	500	41074-38992	Aurignacian	Uzquiano et al., 2008
2	La Güelga	5	OxA-30810	33900	550	40237-37216	Aurignacian	Kehl et al., 2018
2	La Güelga	5	Beta-377233	33610	220	39240-37648	Aurignacian	Kehl et al., 2018
2	La Güelga	5	COL2579.1.1	34121	266	39928-38392	Aurignacian	Kehl et al., 2018
2	La Güelga	5	COL2579.2.1	34500	763	41204-37560	Aurignacian	Kehl et al., 2018
2	La Güelga	5	OxA-30809	34750	600	41226-38507	Aurignacian	Kehl et al., 2018
2	La Güelga	5	COL2578.1.1	34164	273	39981-38451	Aurignacian	Kehl et al., 2018
2	La Güelga	5	COL2578.2.1	34355	751	41099-37440	Aurignacian	Kehl et al., 2018
3	Sopeña	XI	GrA-39760	34470	650	40991-37714	Aurignacian	Pinto-Llona and Grandal-d'Anglade, 2019
4	El Castillo	16	GifA-95539	34300	1000	41415-36925	Aurignacian	Wood et al., 2018
4	El Castillo	16	OxA-22200	38600	1000	44283-41583l	Proto-Aurignacian	Wood et al., 2018
5	Covalejos	B	OxA-32549	34350	600	40805-37661	Early Aurignacian	Jones et al., 2019
5	Covalejos	B	OxA-32513	35150	650	41569-39161	Early Aurignacian	Jones et al., 2019
5	Covalejos	C	OxA-32512	34850	600	41311-38770	Archaic AUR	Jones et al., 2019
5	Covalejos	C	OxA-32511	35250	700	41750-39209	Archaic AUR	Jones et al., 2019
6	El Ruso	5	Beta-70813	34184	1678	42380-35900	Aurignacian	Muñoz Fernández, 1991; Castanedo Tapia, 1997
7	Cobrante	VI	OxA-32505	35150	650	41569-39161	Proto-Aurignacian	Marín-Arroyo et al., 2018
7	Cobrante	VI	GrA-22442	33320	310	39150-37132	Proto-Aurignacian	Muñoz Fernández and Santamaría Santamaría, 2009
8	El Cuco	III	OxA-32502	35050	650	41569-39042	Aurignacian	Marín-Arroyo et al., 2018
9	Lezetxiki	IIIa	OxA‐21837	34550	100	39957-39379	Aurignacian	Maroto et al., 2012
10	Labeko Koba	VI	OxA-21778	35100	600	41380-39195	Early Aurignacian	Wood et al., 2014
10	Labeko Koba	V	OxA-21779	34650	600	41168-38269	Early Aurignacian	Wood et al., 2014
10	Labeko Koba	VII	OxA-21793	35400	650	41713-39391	Proto-Aurignacian	Wood et al., 2014
10	Labeko Koba	VII	OxA-21840	35250	650	41608-39251	Proto-Aurignacian	Wood et al., 2014
10	Labeko Koba	VII	OxA-X-2314-43	36500	700	42347-42070	Proto-Aurignacian	Wood et al., 2014
10	Labeko Koba	VII	OxA-21766	36850	800	42514-40531	Proto-Aurignacian	Wood et al., 2014
10	Labeko Koba	V	OxA-21767	34750	600	41226-38507	Early Aurignacian	Wood et al., 2014
11	Aitzbitarte III	Vb central	OxA-32417	34900	600	41352-38916	Evolved AUR	Marín-Arroyo et al., 2018
12	Arbreda	H	SANU-29017	34800	760	41462-37959	Proto-Aurignacian	Wood et al., 2014
12	Arbreda	H	OxA-3730	35480	820	42004-39251	Proto-Aurignacian	Hedges et al., 1994
12	Arbreda	H	SANU-29016	35700	830	42070-39429	Proto-Aurignacian	Wood et al., 2014
12	Arbreda	H	OxA-21665	35850	700	42020-39727	Proto-Aurignacian	Wood et al., 2014
12	Arbreda	H	OxA-21664	35900	650	42002-39834	Proto-Aurignacian	Wood et al., 2014
12	Arbreda	H	SANU-29019	35900	860	42173-39558	Proto-Aurignacian	Wood et al., 2014
12	Arbreda	H	OxA-21784	36000	700	42087-39855	Proto-Aurignacian	Wood et al., 2014
12	Arbreda	H	OxA-21674	33800	550	40051-37090	Proto-Aurignacian	Wood et al., 2014
13	Mollet I	0,60-0,80 m	OxA-3728	33780	730	40525-36859	Aurignacian	Maroto et al., 1987
14	Cova Gran	497D	AA-68834-ABOX	34179	247	39926-38615	Early Upper Palaeolithic	Mora et al., 2018
15	Abric Romaní	2 base	USGS-2840	35000	500	41116-38287	Early Upper Palaeolithic	Bischoff et al., 1994
15	Abric Romaní	2	AA-8037A	35400	810	41985-39190	Early Upper Palaeolithic	Bischoff et al., 1994
15	Abric Romaní	A	OxA-11967	35900	600	41961-39900	Aurignacian	Camps and Higham, 2012
15	Abric Romaní	A	NzA-2311	36590	640	42273-40597	Early Upper Palaeolithic	Bischoff et al., 1994
15	Abric Romaní	A	AA-6608	36740	640	42319-40726	Early Upper Palaeolithic	Bischoff et al., 1994
16	Lapa do Picareiro	GG-II (GG)	MAMS-42277	33910	160	39508-38411	Early Aurignacian	Haws et al., 2020
16	Lapa do Picareiro	GG-II (GG)	MAMS-42281	33790	190	39410-37897	Early Aurignacian	Haws et al., 2020
16	Lapa do Picareiro	GG-II (GG)	MAMS-44445	33880	160	39484-38333	Early Aurignacian	Haws et al., 2020

## Sheet: Coordinates
Site	X	Y
Aitzbitarte III	-1.89	43.27
L'Arbreda	-2.74	42.15
El Castillo	-3.96	43.29
Cobrante	-3.52	43.32
Cueva del Conde	-5.08	43.28
Cova Gran	0.81	41.92
Covalejos	-3.95	43.38
El Cuco	-3.23	43.39
La Güelga	-5.11	43.34
Labeko Koba	-2.50	43.06
Lapa do Picareiro	-8.63	39.53
Lezetxiki	-2.53	43.07
Mollet I	2.74	42.16
Abric Romaní	1.68	41.53
El Ruso	-3.89	43.42
Sopeña	-4.96	43.33

## Sheet: References
Bischoff, J. L., Ludwig, K., Garcia, J. F., Carbonell, E., Vaquero, M., Stafford Jr, T. W., Jull, A. J. T. (1994): “Dating of the basal Aurignacian sandwich at Abric Romanı (Catalunya, Spain) by radiocarbon and uranium-series”, Journal of Archaeological Science, 21(4), pp. 541-551.
Camps, M., Higham, T. (2012): “Chronology of the Middle to upper Palaeolithic transition at Abric Romaní, Catalunya”, Journal of Human Evolution, 62(1), pp. 89-103. https://doi.org/10.1016/j.jhevol.2011.10.010
Castanedo Tapia, I. (1997): Aproximación a las cadenas operativas líticas del Paleolítico en Cantabria: las cuevas de La Flecha y de El Ruso I. Master Thesis. Universidad de Cantabria. Available from: http://catalogo.unican.es/cgi-bin/abnetopac/?TITN=196907
Haws, J., Benedetti, M., Carvalho, M., Ellis, G., Pereira, T., Cascalheira, J., Bicho, N., Friedl, L. (2020): “Human adaptive responses to climate and environmental change during the Gravettian of Lapa do Picareiro (Portugal)”, Quaternary International. https://doi.org/10.1016/j.quaint.2020.08.009
Hedges, R. E. M., Housley, R. A., Ramsey, C. B., Van Klinken, G. J. (1994): “Radiocarbon dates from the Oxford AMS system: Archaeometry datelist 18”. Archaeometry, 36(2), pp. 337-374.
Jones, J. R., Richards, M. P., Reade, H., Bernaldo de Quirós, F., Marín-Arroyo, A. B. (2019): “Multi-Isotope investigations of ungulate bones and teeth from El Castillo and Covalejos caves (Cantabria, Spain): Implications for paleoenvironment reconstructions across the Middle-Upper Palaeolithic transition”, Journal of Archaeological Science: Reports, 23, pp. 1029-1042. https://doi.org/10.1016/j.j…
Kehl, M., Álvarez-Alonso, D., de Andrés-Herrero, M., Carral González, P., García Sánchez, E., Jordá Pardo, J. F., Menéndez, M., Quesada, J.M., Rethemeyer, J., Rojo, J., Tafelmaier, Y., Weniger, G.-Ch. (2018): “Towards a revised stratigraphy for the Middle to Upper Palaeolithic boundary at La Güelga (Narciandi, Asturias, Spain). Soil micromorphology and new radiocarbon data”, Boletín Geológico y M…
Marín-Arroyo, A. B., Rios-Garaizar, J., Straus, L. G., Jones, J. R., De la Rasilla, M., González Morales, M. R., Richards, M., Altuna, J., Mariezkurrena, K., Ocio, D. (2018): “Chronological reassessment of the Middle to Upper Paleolithic transition and early Upper Paleolithic cultures in Cantabrian Spain”, PloS one, 13(4), https://doi.org/10.1371/journal.pone.0194708
Maroto, J., Soler i Masferrer, N. S., Mir, A. (1987): “La cueva de Mollet I (Serinyà, Gerona)”, Cypsela: revista de prehistòria i protohistòria, pp. 101-110.
Maroto, J., Vaquero, M., Arrizabalaga, Á., Baena, J., Baquedano, E., Jordá, J., Julià, R., Montes, R., Van Der Plicht, Rasines, P., Wood, R. (2012): “Current issues in late Middle Palaeolithic chronology: New assessments from Northern Iberia”, Quaternary International, 247, pp. 15-25. https://doi.org/10.1016/j.quaint.2011.07.007
Mora, R., Martínez-Moreno, J., Roy Sunyer, M., Benito Calvo, A., Polo-Díaz, A., Samper Carro, S. (2018): “Contextual, technological and chronometric data from Cova Gran: Their contribution to discussion of the Middle-to-Upper Paleolithic transition in northeastern Iberia”, Quaternary International, 474, pp. 30-43. https://doi.org/10.1016/j.quaint.2016.05.017
Muñoz Fernández, E. (1991): “Excavaciones arqueológicas en la Cueva del Ruso I. Avance preliminar” Arquenas, pp. 61-157.
Muñoz Fernández, E., Santamaría Santamaría, S. (2009): “Análisis de la industria lítica de la cueva de Cobrante”, Sautuola: Revista del Instituto de Prehistoria y Arqueología Sautuola, (15), pp. 145-189.
Pinto-Llona, A. C., Grandal-d’Anglade, A. (2019): “Conflicting 14C scenarios in the Sopeña cave (northern Iberia): Dating the Middle-Upper Palaeolithic boundary by non-ultrafiltered versus ultrafiltered AMS 14C”, Quaternary International, 522, pp. 1-11. https://doi.org/10.1016/j.quaint.2019.02.038
Uzquiano Ollero, P., Arbizu Senosiaín, M., Arsuaga, J. L., Andan, G., Aramburu Artano, A., Iriarte, E. (2008): “Datos paleoflorísticos en la Cuenca Media del Nalón entre 40-32 Ka. BP: Antracoanálisis de la Cueva Conde (Santo Andriano, Asturias)”, Cuaternario y geomorfología, 22(3-4), pp. 121-133.
Wood, R. E., Arrizabalaga, A., Camps, M., Fallon, S., Iriarte-Chiapusso, M. J., Jones, R., Maroto, J., De la Rasilla, M., Santamaría, D., Soler, J., Soler, N., Villaluenga, A. Higham, T. F. G. (2014): “The chronology of the earliest Upper Palaeolithic in northern Iberia: new insights from L'Arbreda, Labeko Koba and La Viña” Journal of human evolution, 69, pp. 91-109. https://doi.org/10.1016/j.jhe…
Wood, R., Bernaldo de Quirós, F., Maíllo-Fernández, J. M., Tejero, J. M., Neira, A., Higham, T. (2018): “El Castillo (Cantabria, northern Iberia) and the Transitional Aurignacian: Using radiocarbon dating to assess site taphonomy”, Quaternary International, 474, pp. 56-70. https://doi.org/10.1016/j.quaint.2016.03.005
