# Supplementary material for: First modern human settlement recorded in the Iberian hinterland occurred during Heinrich Stadial 2 within harsh environmental conditions
Source: Sci Rep. 2021 Jul 26;11:15161. doi: 10.1038/s41598-021-94408-w (PMC8313528; doi:10.1038/s41598-021-94408-w)
Supplement: Supplementary file 4 — Supplementary Dataset 4. [file 41598_2021_94408_MOESM4_ESM.xlsx]

## Sheet: AMS datings
Dataset 4 - Archaeological sites plotted in Map D of Figure 1 (25 - 20 ka cal BP)
Number	Site	Level	Lab. Code	C14 age	STD	Age cal BP (95,4%)	Technocomplex	References
81	Peña de Candamo	art (Bison n°27)	GifA-96150	17180	310	21752-20010	-	Corchón et al., 2014
18	La Viña	XIII	Lyon-15/OxA-4092	19930	220	24598-23686	Early Upper Palaeolithic	Fortea Pérez, 1995
82	El Buxu	3	GrN-19386	16730	500	21493-19032	Final Solutrean	Menéndez, 1999
19	Cueto de la Mina	F	Ua-3588	17545	205	21935-20729	Middle Solutrean	Hoyos Gómez and Rasilla Vives, 1994
19	Cueto de la Mina	V (1981-1986)	Ua-3586	19110	205	23437-22532	Upper Solutrean	Hoyos Gómez and Rasilla Vives, 1994
19	Cueto de la Mina	E	OxA-10122	19700	500	25047-22632	Upper Solutrean	Stuart et al., 2002
52	La Riera Cave	17	GaK-6445	16900	200	20886-19921	Solutrean/Magdalenian?	Straus and Clark, 1986
52	La Riera Cave	17	GaK-6444	17070	230	21280-20051	Upper Solutrean/Lower Magdalenian	Straus et al., 1977
52	La Riera Cave	20	GaK-6980	17160	440	22017-19797	Lower Magdalenian	Straus et al., 1981
52	La Riera Cave	12	GaK-6446	17210	350	21875-19959	Upper Solutrean/Badegoulian?	Straus et al., 1981
52	La Riera Cave	15	UCR-1272A	17225	350	21900-19986	Upper Solutrean/Badegoulian?	Straus et al., 1983
52	La Riera Cave	16	GaK-6983	18200	610	23395-20581	Upper Solutrean/Badegoulian?	Straus et al., 1981
52	La Riera Cave	1	UCR-1270A	19620	390	24695-22809	Gravettian/Solutrean?	Straus et al., 1983
52	La Riera Cave	10	GaK-6447	19820	390	24894-22995	Upper Solutrean/Badegoulian?	Straus et al., 1977
52	La Riera Cave	1	Ly-1783	20360	450	25701-23720	Lower Solutrean?	Straus et al., 1983
52	La Riera Cave	8	Gak-6981	20690	810	26523-23115	Upper Solutrean	Straus et al., 1981
53	Coímbre Cave	Co.B.5.1	Beta-322480	16980	70	20760-20339	Archaic Magdalenian	Álvarez-Alonso et al., 2016
53	Coímbre Cave	Co.B.5.1	Beta-297106	17110	80	20864-20485	Archaic Magdalenian	Álvarez-Alonso et al., 2016
20	Llonín		OXA-26042	17480	130	21482-20784	Archaic Magdalenian	Bronk Ramsey et al., 2015
20	Llonín		OxA-26041	17610	90	21505-20955	Archaic Magdalenian	Bronk Ramsey et al., 2015
20	Llonín		OxA-26338	17650	75	21729-21025	Archaic Magdalenian	Bronk Ramsey et al., 2015
20	Llonín		OxA-26440	17920	80	22033-21445	Archaic Magdalenian	Bronk Ramsey et al., 2015
20	Llonín		OxA-26339	18345	75	22435-22123	Archaic Magdalenian	Bronk Ramsey et al., 2015
20	Llonín	IV	OxA-22700	19300	110	23429-22976	Upper Solutrean	Aura et al., 2012
20	Llonín	IV	OxA-22699	19330	100	23436-23001	Upper Solutrean	Aura et al., 2012
20	Llonín	IV	OxA-22698	19480	110	23779-23145	Upper Solutrean	Aura et al., 2012
83	Chufín, Cueva	I	CSIC-258	17420	200	21725-20541	Solutrean	Straus et al., 1977
84	Las Aguas	C2	GrA-32756	16880	70	20555-20215	Upper Solutrean	Rasines et al., 2009
84	Las Aguas	Sala 3. Hogar inferior	GrA-30320	17570	80	21447-20936	Archaic Magdalenian	Rasines et al., 2009
84	Las Aguas	C2	GrA-30321	17630	80	21512-20989	Upper Solutrean	Rasines et al., 2009
85	Linar Cave	Sondeo B, Level 3	GrA-27746	19680	90	23617-23360	Solutrean	Rasines et al., 2009
55	Altamira	6	GrA-32760	17200	70	20915-20554	Upper Solutrean	Rasines et al., 2009
55	Altamira	7 med	GrA-30325	19060	90	23209-22721	Upper Solutrean	Rasines et al., 2009
55	Altamira	3	GifA-90045	18540	540	23775-21147	Upper Solutrean	Valladas et al., 1992
55	Altamira	7 sup	GrA-30324	18750	100	22933-22442	Solutrean	Rasines et al., 2009
55	Altamira	7 inf	GrA-32761	19630	80	23625-23350	Upper Solutrean	Rasines et al., 2009
56	Hornos de la Peña	C	BM-1881	18230	510	23300-20828	Solutrean	Yravedra Sáinz de los Terreros, 2010
56	Hornos de la Peña	C	BM-1882	19950	300	24859-23238	Solutrean	Yravedra Sáinz de los Terreros, 2010
4	Castillo, El	art (horse)	GifA-98154	19140	230	23475-22568	Middle Solutrean/Upper Solutrean	González-Sáinz, 2007
4	Castillo, El	10	Beta-242619	19260	90	23386-22966	Solutrean	Bernaldo de Quirós et al., 2015
6	Ruso, El	III	Beta-70810	16410	210	20396-19322	Solutrean	Banks et al., 2008a
21	Morín, Cueva	5sup	SI-953	20710	340	25764-24134	Gravettian	Maíllo Fernández et al., 2001
7	Cobrante, Cueva de	3	GrA-22438	18540	70	22632-22301	Upper Solutrean	Uzquiano, 2014
7	Cobrante, Cueva de	4	GrA-22439	18260	70	22372-22056	Upper Solutrean	Uzquiano, 2014
24	El Mirón	117	GX-25857	17050	60	20801-20455	Lower Magdalenian	Straus et al., 2014
24	El Mirón	313	GX-31194	17400	270	21902-20433	Upper Solutrean/Lower Magdalenian	Straus et al., 2008
24	El Mirón	166	GX-29439	17400	80	21325-20823	Lower Magdalenian	Straus et al., 2014
24	El Mirón	121	GX-32655	18390	300	22974-21671	Upper Solutrean	Straus et al., 2007
24	El Mirón	126	GX-24471	18950	350	23765-22283	Upper Solutrean	Straus et al., 2007
24	El Mirón	125	GX-24770	18980	360	23784-22285	Upper Solutrean	Straus et al., 2007
59	Arlanpe	III	Beta-238178	17070	80	20843-20450	Upper Solutrean	Ríos Garáizar et al., 2013
59	Arlanpe	II	Beta-261389	17160	70	20885-20530	Upper Solutrean	Ríos Garáizar et al., 2013
59	Arlanpe	II	Beta-261388	17260	70	20970-20585	Solutrean	Ríos Garáizar et al., 2013
25	Antoliñako koba	Lmc	Beta-230284	19020	120	23201-22552	Upper Solutrean	Aguirre, 2012
25	Antoliñako koba	Lmc	GrN-23785	19280	120	23428-22960	Upper Solutrean	Aguirre, 1999
86	Askondo	4	Beta-316473	17490	90	21390-20893	Upper Solutrean	Ríos Garáizar and Gárate Maidagán, 2012
9	Lezetxiki	II	I-6114	19340	780	25396-21807	Gravettian	Baldeón, 1987
87	Praileaitz I	V	Beta-162879	17760	70	21890-21320	Solutrean	Peñalver Iribarren and Múguca Alustiza, 2003
87	Praileaitz I	V	GrA-24687	19330	150	23475-22994	Solutrean	D'Errico et al., 2017
88	Urtiaga	Fbase	GrN-5817	17050	140	20912-20286	Archaic Magdalenian	Almagro Gorbea, 1973
29	Amalda	IV	I-11355	17580	440	22398-20290	Upper Solutrean	Dupré Ollivier, 1988
29	Amalda	V	I-11372	17880	390	22547-20647	Gravettian	Altuna, 1992
29	Amalda	V	I-11663	19000	340	23769-22345	Gravettian	Altuna, 1992
89	Aitzbitarte IV	III	GrN-5993	17950	150	22226-21381	Upper Solutrean	Altuna, 1972
12	L'Arbreda	B	Gif-6419	17720	290	22266-20793	Upper Solutrean	Delibrias et al., 1987
12	L'Arbreda	A	Gif-6418	17320	290	21865-20275	Upper Solutrean	Delibrias et al., 1987
12	L'Arbreda	E	Gif-6420	20130	220	24844-23776	Gravettian	Delibrias et al., 1987
33	Reclau Viver	4.8-5.0 m	M-1016	18700	800	24762-20797	Early Upper Palaeolithic	Muñoz Amilibia, 1967
90	Chaves	C1	GrN-12681	19700	310	24465-22993	Upper Solutrean	Montes and Utrilla, 2008
64	Fuente del Trucho	UA1 0.75-0.95	Beta-72393	19060	80	23190-22835	Proto-Solutrean?	Mir and Salas, 2000
64	Fuente del Trucho	Rev	GRA-29915	20800	100	25313-24720	Gravettian?	Montes and Utrilla, 2008
91	Balma de la Xemeneia		Beta-191695	18950	90	23034-22569	Upper Solutrean	Mangado et al., 2010
92	Montlleó	Sect B	OaX-X-2234-52	16900	110	20751-20141	Lower Magdalenian	Mangado et al., 2009
93	Cueva Mayor	10 P-1	Beta-209452	16980	80	20779-20321	Solutrean?/Gravettian?	Carretero et al., 2008
14	Cova Gran	EA-3. Sector P	Beta-233606	16800	80	20505-20094	Early Magdalenian	Mora et al., 2011
94	Gato 2	2	GrA-42226	17700	70	21791-21113	Archaic Magdalenian	Utrilla et al., 2012
94	Gato 2	2	GrA-30683	18090	90	22280-21795	Archaic Magdalenian	Utrilla et al., 2012
94	Gato 2	2	GrA-22503	18260	130	22444-21945	Archaic Magdalenian	Utrilla et al., 2012
94	Gato 2	2	GrA-22505	18650	140	22930-22345	Archaic Magdalenian	Utrilla et al., 2012
94	Gato 2	2	GrA-30684	18850	100	22981-22502	Archaic Magdalenian	Utrilla et al., 2012
65	Balma de la Griera		GrA-6486	16890	200	20880-19912	Upper Palaeolithic	García Díez and Cebrià i Escuer, 2003
95	Fariseu	9	GrA-40167	19020	80	23110-22699	Upper Solutrean	Aubry et al., 2010
68	Peña Capón	1	COL4210.1.1	20008	112	24262-23805	Solutrean	Alcaraz-Castaño et al., 2019
68	Peña Capón	1	OxA-39498	19928	97	24195-23786	Solutrean	This paper
68	Peña Capón	1	OxA-39505	19950	110	24220-23790	Solutrean	This paper
68	Peña Capón	2a	COL4212.1.1	20277.6	107.43	24937-23874	Solutrean	Alcaraz-Castaño et al., 2019
68	Peña Capón	2a	COL4213.1.1	20107.1	111.43	24468-23843	Solutrean	Alcaraz-Castaño et al., 2019
68	Peña Capón	2a	COL4214.1.1	19986.8	109.57	24243-23803	Solutrean	Alcaraz-Castaño et al., 2019
68	Peña Capón	2a	COL4215.1.1	20261.4	110.54	24675-23970	Solutrean	Alcaraz-Castaño et al., 2019
68	Peña Capón	2a	OxA-39499	20370	110	24871-24175	Solutrean	This paper
68	Peña Capón	2b	OxA-X-3048-17	20308	150	24903-23974	Solutrean	This paper
68	Peña Capón	2b	OxA-39500	20450	110	24956-24239	Solutrean	This paper
68	Peña Capón	2b	OxA-39506	20399	63	24747-24225	Solutrean	This paper
68	Peña Capón	3	COL4217.1.1	20006.2	107.21	24252-23811	Solutrean	This paper
68	Peña Capón	II	COL4223.1.1	20023.5	108.43	24270-23812	Solutrean	Alcaraz-Castaño et al., 2019
68	Peña Capón	II	Beta - 246880	19930	110	24213-23780	Solutrean	Alcaraz-Castaño et al., 2013
68	Peña Capón	III	Beta - 246879	19980	110	24239-23800	Proto-Solutrean	Alcaraz-Castaño et al., 2013
70	Buraca Grande	5, 9	Gif-9502	17850	200	22182-21032	Solutrean	Aubry et al., 1997
38	Buraca Escura		Gif-4585	18040	230	22432-21248	Solutrean	Banks et al., 2008b
39	Lagar Velho	LV1 burial	GrA-10972	17380	160	21432-20542	Gravettian	Pettitt et al., 2002
39	Lagar Velho	LV1 burial	Gra-12194	17660	160	21907-20929	Gravettian	Pettitt et al., 2002
39	Lagar Velho	9	OxA-8419	20220	180	24823-23841	Middle Solutrean	Cascalheira, 2013
39	Lagar Velho	Q-Z (TP07a)	OxA-8426	20570	130	25263-24505	Gravettian	Haws, 2012
40	Caldeirão, Gruta do	H	OxA-2511	20530	270	25352-23944	Middle Solutrean	Zilhão, 1997
40	Caldeirão, Gruta do	H / Salle	OxA-1939	19900	260	24635-23240	Middle Solutrean	Zilhão, 1997
40	Caldeirão, Gruta do	Fc	OxA-2510	18840	200	23135-22361	Upper Solutrean	Zilhão, 1997
40	Caldeirão, Gruta do	Fa top/ Salle	OxA-1938	20400	270	25199-23874	Middle Solutrean	Zilhão, 1997
40	Caldeirão, Gruta do	Fa top	ICEN-295	20400	207	25114-23985	Solutrean	Zilhão, 1997
113	Maltravieso	A (Sala de las Chimeneas)	Poz-30469	17840	90	21980-21392	Final Solutrean/Early Magdalenian	Canals et al., 2010
113	Maltravieso	A (Sala de las Chimeneas)	Poz-30460	17930	100	22071-21430	Final Solutrean/Early Magdalenian	Canals et al., 2010
74	Cabeço do Porto Marinho	9	SMU-2633	17515	270	21989-20541	Early Magdalenian	Cardoso, 2009
74	Cabeço do Porto Marinho		ICEN-691	19220	280	23799-22558	Gravettian	Cardoso, 2009
76	Lapa do Anecrial	1	GrA-12019	20520	100	25020-24304	Solutrean	Brugal, 2006
114	Vale Almoinha / Vale da Fonte	5SIII	ICEN-71	20380	150	24996-24115	Middle Solutrean	Cardoso and Corchón, 2005
114	Vale Almoinha / Vale da Fonte	5AIII	OxA-5676	19940	180	24502-23723	Middle Solutrean	Cardoso and Corchón, 2005
115	Lapa da Rainha	Corte-II Camada 5	ICEN-790	20300	220	25035-23885	Lower Solutrean?	Cardoso and Gomes, 1994
116	Salemas, Gruta de	V.S	ICEN-367	17770	420	22490-20505	Upper Solutrean	Cardoso and Corchón, 2005
116	Salemas, Gruta de	V.S	ICEN-385	19220	300	23815-22518	Upper Solutrean	Cardoso and Corchón, 2005
116	Salemas, Gruta de	V.S.II?	ICEN-376	20250	320	25242-23745	Upper Solutrean	Cardoso and Corchón, 2005
117	Escoural		MBN-406	19027	103	23162-22596	Middle Solutrean?	Cardoso and Gomes, 1994
43	Mallaetes	II	KN-1/915	19370	105	23463-23035	Solutreo-Gravettian	Straus et al., 1978
43	Mallaetes	SE Va	KN-1919	20140	460	25355-23137	Middle Solutrean	Straus et al., 1978
118	El Parpalló	T-16	OxA-22651	19020	100	23143-22597	Solutreo-Gravettian	Aura et al., 2012
118	El Parpalló		OxA-26341	16790	90	20513-20050	Badegoulian	Bronk Ramsey et al., 2015
118	El Parpalló	4-4.25 m	Birm-521	17896	340	22465-20849	Upper Solutrean	Bofinger and Davidson, 1977
118	El Parpalló	4,75-5	BM-861	18080	810	23898-19981	Upper Solutrean	Bofinger and Davidson, 1977
118	El Parpalló	T-11	OxA-22629	18510	100	22744-22210	Badegoulian	Aura et al., 2012
118	El Parpalló		OxA-26343	18520	100	22774-22228	Badegoulian	Bronk Ramsey et al., 2015
118	El Parpalló		OxA-26344	18560	100	22844-22294	Badegoulian	Bronk Ramsey et al., 2015
118	El Parpalló		OxA-22890	19690	110	23915-23335	Solutrean	Bronk Ramsey et al., 2015
118	El Parpalló	6.25-6.5 , 7.25-7.75	BIRM-520	20170	375	25270-23667	Lower Solutrean?	Cardoso, 2009
118	El Parpalló		OxA-22652	20290	120	24770-23990	Solutrean	Bronk Ramsey et al., 2015
119	Barranc Blanc, Cueva del		Gif-7060	17800	290	22307-20876	Lower Magdalenian	Cacho Quesada and Ripoll López, 1987
120	Beneito, Cueva	IV (ext)	Ua-32244	18275	175	22563-21765	Upper Solutrean	Domenech Faus et al., 2012
121	Les Calaveres	I		20665	1066	27330-22668	Upper Solutrean	Straus, 1991
122	Santa Maira	II-12	Beta-317412	19910	100	24191-23776	Middle Solutrean	Aura Tortosa and Jordá-Pardo, 2012
45	Les Cendres	XIII		17210	60	20914-20570	Upper Solutrean	Román Monroig and Villaverde Bonilla, 2014
45	Les Cendres	XII base	Beta-118024	17230	130	21122-20471	Upper Solutrean	Villaverde et al., 1999
45	Les Cendres	XIII	Beta-118026	18920	180	23195-22415	Upper Solutrean	Villaverde et al., 1999
45	Les Cendres	XIIIB	Beta-118027	18750	130	22950-22420	Upper Solutrean	Villaverde et al., 1999
123	Ratlla del Bubo	II	Ly-5219	17360	180	21474-20482	Upper evolved Solutrean	Soler et al., 1990
47	Boja, La	SW18B1	VERA-5788	16580	70	20272-19845	Solutrean	Lucena et al., 2013
47	Boja, La	SW18B2	VERA-5364-a	16990	70	20771-20355	Solutrean	Lucena et al., 2013
47	Boja, La	SW18B2	VERA-5364-b	17430	70	21324-20862	Upper Solutrean	Lucena et al., 2013
47	Boja, La	SW18C	VERA-5365	19390	100	23473-23063	Upper Solutrean	Lucena et al., 2013
48	Finca Doña Martina	4-5	VERA-5101bHS	19180	90	23344-22925	Upper evolved Solutrean	Zilhão et al., 2010
77	Ambrosio, Cueva de	IV	Gif-7275	16620	280	20806-19456	Upper Solutrean	Jordá-Pardo et al., 2012
77	Ambrosio, Cueva de	II g	Gif-9883	19250	70	23361-22971	Upper Solutrean	Ripoll et al., 2013
77	Ambrosio, Cueva de	II.1	GifA-95577	19950	210	24591-23706	Upper Solutrean	Jordá-Pardo et al., 2012
77	Ambrosio, Cueva de	II-1	GifA-95576?	20150	200	24780-23793	Upper Solutrean	Jordá-Pardo et al., 2012
77	Ambrosio, Cueva de	IICapa4	GifA-II.4	19110	90	23280-22880	Upper Solutrean	Ripoll et al., 2013
77	Ambrosio, Cueva de	IICapa2	GifA-II.2	19170	190	23746-22694	Upper Solutrean	Ripoll et al., 2013
77	Ambrosio, Cueva de	II.6	GifA-II.6	19300	190	23760-22948	Upper Solutrean	Ripoll et al., 2013
49	Vale Boi	Shelter C1, B6 (rock shelter)	Wk-24763	19533	92	23791-23241	Upper Solutrean	Manne et al., 2012
49	Vale Boi	Shelter B1, C1 (rock shelter)	Wk-17840	20340	160	24962-24003	Solutrean	Manne et al., 2012
49	Vale Boi	Shelter B6, A (base; rock shelter)	Wk-24765	18859	90	22981-22520	Upper Solutrean	Manne et al., 2012
49	Vale Boi	Shelter C4,	Wk-26800	20620	160	25220-24310	Solutrean	Manne et al., 2012
49	Vale Boi	Slope 2, G25.4	Wk-12131	17634	110	21765-20965	Upper Solutrean	Manne et al., 2012
49	Vale Boi	Slope 2, G25.10	Wk-12130	18410	165	22800-22007	Proto-Solutrean	Manne et al., 2012
49	Vale Boi	Shelter D2	Wk-26802	20570	158	25170-24280	Solutrean	Manne et al., 2012
49	Vale Boi	Shelter C4	Wk-26800	20620	160	25220-24310	Solutrean	Manne et al., 2012
79	Nerja, Cueva de	8c (hogar), Vestíbulo	UBAR-98	17940	200	22311-21181	Upper Solutrean	Jordá-Pardo and Aura-Tortosa, 2009
79	Nerja, Cueva de	Art (black deer)	GifA-98191	19900	210	24543-23682	Solutrean	Jordá-Pardo and Aura-Tortosa, 2006
79	Nerja, Cueva de	8k-l, Vestíbulo A7-A8, B7-B9	UBAR-158	18420	530	23420-20987	Middle Solutrean/Upper Solutrean	Jordá-Pardo et al., 1999
124	La Pileta	Rock art (black auroch)	GifA-98162	20130	350	25192-23681	Middle Solutrean?	Sanchidrián-Torti and Márquez Alcántara, 2003
80	Higueral de Sierra Valleja	V	OxA-12770	20780	80	25275-24792	Gravettian	Jennings et al., 2009
51	Gorham's Cave	III-B	Beta-184042	18440	160	22827-22052	Solutrean	Finlayson et al., 2006

## Sheet: TL-OSL datings
Number	Site	Level	Lab Code			Cultural attribution	Reference
30	Mugarduia Sur	1	MAD-4273	20240	2597	Gravettian	Barandiarán et al., 2007
36	Cardina 1	CAR-4 (bottom)	GYF-Card no.7	20700	1300	Solutrean	Aubry et al., 2010
36	Cardina 1	CAR-4 (bottom)	GYF-Card no.8	23400	1500	Proto-Solutrean	Aubry et al., 2010
105	Las Delicias	Sector I. Level IIb	MAD-5585SDA	18175	1333	Solutrean	Alcaraz-Castaño et al., 2017
50	Bajondillo	10	MAD-2470	24344	2653	Gravettian	Cortés, 2010

## Sheet: Undated Solutrean Inland Iberia
Number	Site	Reference
66	Foz do Medal	Gaspar et al., 2015
67	Olga Grande	Aubry, 1998
104	Valdivia	Baena & Carrión, 2002
106	El Sotillo	Baena & Carrión, 2002
107	Nicasio Poyato	Baena & Carrión, 2002
108	Puente de los Tres Ojos	Tapias et al., 2012
109	Martínez	Baena & Carrión, 2002
110	El Cojo	Baena & Carrión, 2002
111	Santiago	Baena & Carrión, 2002
112	Valdocarros	Baena & Carrión, 2002

## Sheet: Pre-Magdalenian rock art Inland
Number	Site	Reference
96	Canada do Inferno	Baptista 2008
97	Quinta da Barca	Baptista 2008
98	Penascosa	Baptista 2008
99	La Griega	Alcolea-González & Balbín-Behrmann, 2012; cf Corchón Rodríguez et al., 2012
100	El Reno	Alcolea-González et al, 1997
101	El Cojo	Balbín-Behrmann 2002
102	La Hoz	Balbín-Behrmann et al., 1995
103	Los Casares	Alcolea-González & Balbín-Behrmann, 2012

## Sheet: Coordinates
Site	X	Y
Las Aguas	-4.17	43.37
Aitzbitarte IV	-1.89	43.26
Altamira	-4.11	43.37
Amalda	-2.20	43.22
Ambrosio, Cueva de	-2.09	37.83
Antoliñako koba	-2.66	43.36
L'Arbreda	-2.74	42.15
Ardales	-4.82	36.87
Arlanpe	-2.76	43.19
Askondo	-2.66	43.13
Bajondillo	-4.49	36.62
Balma de la Griera	1.58	41.22
Balma de la Xemeneia	2.64	42.01
Barranc Blanc, Cueva del	-0.27	38.93
Beneito, Cueva	-0.46	38.8
Boja, La	-1.48	38.08
Buraca Escura	-8.55	39.97
Buraca Grande	-8.55	39.98
El Buxu	-5.09	43.35
Cabeço do Porto Marinho	-8.93	39.36
Les Calaveres	-0.02	38.79
Las Caldas	-5.92	43.33
Caldeirão, Gruta do	-8.41	39.65
Canada do Inferno	-7.10	40.99
Cardina 1	-7.1	40.97
Los Casares	-2.29	40.91
Castillo, El	-3.96	43.29
Les Cendres	0.15	38.68
Chaves	-0.14	42.21
Chufín, Cueva	-4.45	43.28
Cobrante, Cueva de	-3.52	43.32
Coímbre Cave	-4.68	43.32
El Cojo (Arenero de)	-3.74	40.65
Cueto de la Mina	-4.85	43.42
Delicias	-3.68	40.39
Escoural	-8.13	38.55
Fariseu	-7.14	41.08
Finca Doña Martina	-1.49	38.04
Foz do Medal	-6.88	41.25
Fuente del Trucho	0.03	42.19
Gato 2	-1.28	41.60
Cova Gran	0.81	41.92
Gorham's Cave	-5.35	36.11
La Griega	-3.81	41.12
Higueral de Sierra Valleja	-5.81	36.75
Hornos de la Peña	-4.03	43.26
La Hoz	-2.32	40.98
Lagar Velho	-8.69	39.74
Lapa da Rainha	-8.90	39.69
Lapa do Anecrial	-8.45	39.32
Lezetxiki	-2.53	43.07
Linar Cave	-4.17	43.35
Llonín	-4.65	43.33
Mallaetes	-0.29	39.02
Maltravieso	-6.37	39.45
Martínez	-3.69	40.37
Cueva Mayor	-3.53	42.33
El Mirón	-3.45	43.24
Montlleó	1.52	42.23
Morín, Cueva	-3.85	43.35
Mugarduia Sur	-2.14	42.79
Nerja, Cueva de	-3.84	36.76
Nicasio Poyato	-3.69	40.35
Olga Grande	-7.05	40.96
El Parpalló	-0.27	39.00
Penascosa	-7.10	40.98
Peña de Candamo	-6.07	43.45
Peña Capón	-3.20	40.95
La Pileta	-5.26	36.69
Praileaitz I	-2.35	43.29
Puente de los Tres Ojos	-3.66	40.38
Quinta da Barca	-7.10	40.99
Ratlla del Bubo	-0.80	38.24
Reclau Viver	2.74	42.16
El Reno & El Cojo (cueva de)	-3.31	40.94
La Riera Cave	-4.85	43.42
Ruso, El	-3.89	43.42
Salemas, Gruta de	-9.20	38.88
Santa Maira	-0.21	38.73
Santiago	-3.56	40.31
El Sotillo	-3.70	40.39
Urtiaga	-2.31	43.28
Valdivia	-3.69	40.40
Valdocarros	-3.43	40.30
Vale Almoinha / Vale da Fonte	-9.24	39.04
Vale Boi	-8.81	37.09
Valverde	-7.48	42.56
La Viña	-5.82	43.31

## Sheet: References
Aguirre Ruíz de Gopegui, M. (1999): “Antoliñako Koba (Gautegiz, Arteaga). II Campaña de Excavaciones” Arkeiokuska, 98, pp. 99-102.
Aguirre Ruiz de Gopegui, M. (2012): “Ocupaciones gravetienses de Antoliñako koba: aproximación preliminar a su estratigrafía, cronología e industrias”. In: De Las Heras, C., Lasheras, J.A., Arrizabalaga, A., Rasilla, M. de la (coords.), Pensando el Gravetiense: nuevos datos para la Región Cantábrica, en su contexto peninsular y pirenaico, Monografías del Museo y Centro de Investigación de Altamir…
Alcaraz-Castaño, M., Alcolea-González, J., Balbín-Behrman, R. de, Kehl, M., Weniger, G-Ch. (2019): “Recurrent human occupations in Central Iberia around the Last Glacial Maximum. The Solutrean sequence of Peña Capón updated”. In Human adaptations to the Last Glacial Maximum: The Solutrean and its neighbors. 3rd international Conference on the Solutrean. Cambridge Scholars Publishing, Faro (Portug…
Alcaraz-Castaño, M., López-Recio, M., Tapias, F., Cuartero, F., Baena, J., Ruiz-Zapata, B., Morín J., Pérez-González, A., Santonja, M. (2017): “The human settlement of Central Iberia during MIS 2: New technological, chronological and environmental data from the Solutrean workshop of Las Delicias (Manzanares River valley, Spain)”, Quaternary International, 431(Part B), pp. 104-124. https://doi.org…
Alcolea González, J. J., Balbín Behrmann, R. de, García Valero, M.A., Jiménez Sanz, P.J. (1997): “Nuevos descubrimientos de arte rupestre paleolítico en el centro de la Península Ibérica: la cueva del Reno (Valdesotos, Guadalajara)”, II Congreso de Arqueología Peninsular: Zamora, del 24 al 27 de septiembre de 1996, Fundación Rei Afonso Henriques, pp. 239-258.
Alcolea-González, J. J., Balbín-Behrmann, R. de (2012): "El Arte rupestre Paleolítico del interior peninsular". In Arte sin artistas, una mirada al Paleolítico. Museo Arqueológico Regional, Comunidad de Madrid, pp. 187-207.
Almagro Gorbea, M. (1973): “C-14, 1973. Nuevas fechas para la historia y la arqueología peninsular”, Trabajos de Prehistoria, 30, pp. 311-318.
Altuna, J. (1992): “Dataciones de radiocarbono para el Perigordiense Superior del País Vasco”, Munibe, 43, pp. 31-32.
Altuna, J. (1972): Fauna de mamíferos de los yacimientos prehistóricos de Guipúzcoa, Munibe, 24, Sociedad de Ciencias Aranzadi, San Sebastián
Álvarez-Alonso, D., Yravedra, J., Jordá-Pardo, J.F., Arrizabalaga, A. (2016): “The Magdalenian sequence at Coímbre cave (Asturias, Northern Iberian Peninsula): Adaptive strategies of hunter–gatherer groups in montane environments”, Quaternary International, 402, pp. 100-111. https://doi.org/10.1016/j.quaint.2015.09.084
Aubry, T. (1998): “Olga Grande 4: uma sequência do Paleolítico superior no planalto entre o Rio Côa e a Ribeira de Aguiar”, Revista Portuguesa de Arqueologia, 1(1), pp. 1-22.
Aubry, T., Dimuccio, L.A., Bergadà, M.M., Sampaio, J.D., Sellami, F. (2010): “Palaeolithic engravings and sedimentary environments in the Côa River Valley (Portugal): implications for the detection, interpretation and dating of open-air rock art”, Journal of Archaeological Science, 37(12), pp. 3306-3319. https://doi.org/10.1016/j.jas.2010.07.033
Aubry, T., Fontugne, M., Moura, M. H. (1997): “Les occupations de la grotte de Buraca Grande depuis le Paléolithique supérieur et les apports de la séquence holocène à l'étude de la transition Mésolithique/Néolithique au Portugal” Bulletin de la Société préhistorique française, pp. 182-190. https://www.jstor.org/stable/27921350
Aura Tortosa, J.E., Jordá Pardo, J.F. (2012): “Solutrenses del Sur de Iberia en transición”, Espacio, Tiempo y Forma. Serie I, Prehistoria y Arqueología, 5, pp. 149-169.
Aura, J. E., Tiffagom, M., Jordá Pardo, J. F., Duarte, E., Vega, J.F. de la, Santamaria, D., Rasilla, M. de la, Vadillo, M., Pérez Ripoll, M. (2012): “The Solutrean–Magdalenian transition: a view from Iberia” Quaternary International, 272, pp. 75-87. https://doi.org/10.1016/j.quaint.2012.05.020
Baena Preysler, J., Carrión Santafé, E. (2002) “Los materiales solutrenses”. In Blasco Bosqued, C. La Colección Bento del Museu d’Arqueologia de Catalunya. Una nueva mirada a la Prehistoria Madrileña, Monografies (Museu d’Arqueologia de Catalunya-Barcelona), pp. 79-130.
Balbín R. de (2002): "Estado actual de la investigación del Arte Paleolítico en Guadalajara". In E. García-Soto & M. A. García Valero (eds.): "Actas del Primer Simposio de Arqueología de Guadalajara": 187-288.
Balbin Behrmann, R. de, Alcolea González, J.J., Moreno Sanz, F., Cruz Naimi, L. A. (1995): “Investigaciones arqueologicas en la cueva de La Hoz (Santa maría del espino, Guadalajara). Una visión de conjunto actualizada”, In: Balbín, R. de, Valiente, J., Mussat, M. (coords.). “Arqueología en Guadalajara“. Patrimonio Histórico-Arqueología Castilla-La Mancha. pp. 37-53
Baldeon, A. (1987): El Paleolitico medio del Pais Vasco, Deusto, Universidad de Deusto.
Banks, W.E., d'Errico, F., Townsend Peterson, A., Kageyama, M., Colombeau, G. (2008a): “Reconstructing ecological niches and geographic distributions of caribou (Rangifer tarandus) and red deer (Cervus elaphus) during the Last Glacial Maximum” Quaternary Science Reviews, 27(27-28), 2568-2575. https://doi.org/10.1016/j.quascirev.2008.09.013
Banks, W. E., d'Errico, F., Townsend Peterson, A., Vanhaeren, M., Kageyama, M., Sepulchre, P., Ramstein, G., Jost, A., Lunt, D. (2008b): “Human ecological niches and ranges during the LGM in Europe derived from an application of eco-cultural niche modeling”, Journal of Archaeological Science, 35(2), pp. 481-491. https://doi.org/10.1016/j.jas.2007.05.011
Baptista, A.M. (2008): “O paradigma perdido. O Vale do Côa e a Arte Paleolitica de ar livre em Portugal.” Ediçoes Afrontamento. Parque Arqueologico do Vale do Côa.
Barandiarán, I., Benéitez, P., Cava, A., Millán Chagoyen, M. A. (2007): “El taller gravetiense de Mugarduia sur (Navarra): identificación y cronología”, Zephyrus, 60, pp. 15-26.
Bernaldo de Quirós, F., Castaños, P., Maíllo-Fernandéz, J.M., Neira, A. (2015): “The Solutrean unit of El Castillo cave, Spain”. In: Sázelová, S., Novák, M, Mizerová, A. (eds.) Forgotten times and spaces: New perspectives in paleoanthropological, paleoetnological and archeological studies, Brno: Institute of Archeology of the Czech Academy of Sciences; Masaryk University, pp. 410–417.
Bofinger, E., Davidson, I. (1977): “Radiocarbon age and depth: a statistical treatment of two sequences of dates from Spain” Journal of Archaeological Science, 4(3), pp. 231-243.
Bronk Ramsey, C., Higham, T.F.G., Brock, F., Baker, D., Ditchfield, P., Staff, R.A. (2015): “Radiocarbon Dates from the Oxford AMS System: Archaeometry Datelist 35”, Archaeometry, 57(1), 177-216. https://doi.org/10.1111/arcm.12134
Brugal, J. P. (2006): “Petit gibier et fonction de sites au Paléolithique supérieur. Les ensembles fauniques de la grotte d’Anecrial (Porto de Mos, Estremadure, Portugal)” PALEO. Revue d'archéologie préhistorique, 18, pp. 45-68.
Cacho Quesada, C., Ripoll López, S. (1987): “Nuevas piezas de arte mueble ene el Mediterráneo español”, Trabajos de Prehistoria, 44, pp. 35-62
Canals, A., Rodríguez-Hidalgo, A., Peña, L., Mancha, E., García-Díez, M., Bañuls, S., Euba, I., López-García, J.M., Barrero, N., Bermejo, I., García, F.J., Mehías, D., Modesto, M., Morcillo, A., Aranda, V., Carbonell, E. (2010): “Nuevas aportaciones al Paleolítico superior del suroeste peninsular: la cueva de Maltravieso, más allá del santuario extremeño de las manos”. In Mangado, X. (ed.) El Pal…
Cardoso, G. (2009): Cronologias Absolutas par Península Ibérica. Sítios Pré-Históricos do Alto Ribatejo, Portugal, PhD Dissertation, Instituto Politécnico de Tomar, Universidad de Tras-os-Montes e Alto Douro.
Cardoso, J. L., Corchón, M. (2005): “Reflexiones sobre el Solutrense Portugués: a propósito de la industria Paleolítico Superior de Correio-Mor (Loures)”, Zephyrus. Revista de Prehistoria y Arqueología, 58, pp. 89-110.
Cardoso, J. L., Gomes, M. V. (1994): “Zagaias do Paleolítico superior de Portugal” Portugalia, 15, pp. 9-31.
Carretero, J. M., Ortega, A. I., Juez, L., Pérez-González, A., Arsuaga, J. L., Pérez-Martínez, R., Ortega, M. C. (2008): “A Late Pleistocene-Early Holocene archaeological sequence of Portalón de Cueva Mayor (Sierra de Atapuerca, Burgos, Spain), Munibe (Antropologia-Arkeologia), 59, pp. 67-80.
Cascalheira, J. (2013): “Solutrense em Portugal: novidades do século XXI”. In Arqueologia em Portugal—150 anos (Atas do I Congresso da Associação dos Arqueólogos Portugueses), Associação dos Arqueólogos Portugueses, Lisboa, pp. 269-276.
Corchón Rodríguez, M. S., Hernando, C., Rivero, O, Gárate, D., Ortega, P. (2012): “La cueva de La Griega (Pedraza, Segovia, España) en la encrucijada ibérica: nuevos análisis del arte parietal paleolítico a través del análisis factorial de correspondencias” Espacio Tiempo y Forma. Serie I, Prehistoria y Arqueología, 1(5), pp. 527-542.
Corchón Rodríguez, M. S., Gárate Maidagán, D., Valladas, H., Rivero Vilá, O., Pons-Branchu, E., Ortega Martínez, P., Hernando Álvarez, C. (2014): “De vuelta al punto de partida: nuevas dataciones del arte de la cueva de La Peña de Candamo (Asturias)”, Zephyrus, 73, pp. 67-82.
Cortés, M. (2010): “El Paleolítico superior en el sur de la Península Ibérica. Un punto de partida a comienzos del siglo XXI”. In: El Paleolítico superior peninsular. Novedades del siglo XXI (Homenaje al profesor Javier Fortea, Monografies Seminari d’Estudis i Recerques Prehistòriques, 8, Universidad de Barcelona, Barcelona, pp. 173-197.
Delibrias, G., Romain, O., Le Hasif, G. (1987): “Datation par la méthode du carbone 14 du remplissage de la grotte de l'Arbreda”, Cypsela: revista de prehistòria i protohistòria, VI, pp. 133-135.
Domenech Faus, E., Bergadà Zapata, M., Roca de Togores Muñoz, C. (2012): “Nuevas aportaciones al Paleolítico superior medio de la Cova Beneito”, Recerques del Museu d'Alcoi, 21, pp. 7-18
Dupre Ollivier, M. (1988): Palinología y Paleoambiente. Nuevos datos españoles. Referencias. Trabajos Varios, 84. Servicio de Investigación Prehistórica, Diputación Provincial de Valencia, Valencia.
D’Errico, Vanhaeren, M., Queffelec (2017): “Les galets perforés de Praileaitz I”, Munibe Monographs. Anthropology and Archaeology Series, 1, pp. 453-484.
Finlayson, G., Giles Pacheco, F., Rodríguez-Vidal, J., Fa, D., Gutierrez López, J.M., Santiago Pérez, A., Finlayson, G., Allue, E., Baena Preysler, J., Cáceres, I., Carrión, J., Fernández Jalvo, Y., Gleed-Owen, C., Jiménez Espejo, F., López, P., López Sáez, J.A., Riquelme Cantal, J.A., Sánchez Marco, A., Giles Guzman, F., Brown, K., Fuentes, N., Valarino, C., Villalpando, A., Stringer, C.B., Mart…
Fortea Pérez, F. J. (1995): “Abrigo de La Viña: informe y primera valoración de las campañas 1991 a 1994”. In Excavaciones arqueológicas en Asturias: 1991-94, Servicio de Publicaciones, pp. 19-32.
García Díez, M., Cebrià i Escuer, C. (2003): “Evidencia gráfica mueble del paleolítico superior antiguo: La Balma de la Griera (Calafell, Baix Penedès, Tarragona)”, Zephyrus, 56, pp. 39-48.
Gaspar, R., Ferreira, J., Hernández, F. M., García-Vadillo, F., Rebelo, P., Neto, N. (2015): “Away from the Edges: A New Solutrean Site in Interior Iberia (Foz do Medal Left Bank, Sabor Valley, Northeast Portugal)”, Journal of Anthropological Research, 71(4), pp. 545-564. https://doi.org/10.3998/jar.0521004.0071.405
González Sáinz, C. (2007): “Dating Magdalenian art in north Spain: the current situation”. In Pettitt, P., Bahn, P., Ripoll, S., Palaeolithic cave art at Creswell crags in European context, University Press, Oxford, pp. 247-262.
Haws, J. A. (2012): “Paleolithic socionatural relationships during MIS 3 and 2 in central Portugal”, Quaternary International, 264, pp. 61-77. https://doi.org/10.1016/j.quaint.2011.10.003
Hoyos Gómez, M.; Rasilla Vives, M. de la (1994): “Dataciones C 14 del Paleolítico superior del Abrigo de Cueto de la Mina (Posada de Llanes, Asturias)”, Trabajos de Prehistoria, 51(2), pp. 143-147
Jennings, R., Giles Pacheco, F., Barton, R.N.E., Collcutt, S.N., Gale, R., Gleed-Owen, C.P. (2009): “New dates and palaeoenvironmental evidence for the Middle to Upper Palaeolithic occupation of Higueral de Valleja Cave, southern Spain”, Quaternary Science Reviews, 28, pp. 830-839. https://doi.org/10.1016/j.quascirev.2008.11.014
Jordá-Pardo, J.F., Aura, J. E. (2006): “Radiocarbono, cronoestratigrafia y episodios ocupacionales en el Pleistoceno superior y Holoceno de la Cueva de Nerja (Málaga, Andalucía, España)”. In J. M. Maíllo-Fernández, E. Baquedano (eds.), Miscelánea en homenaje a Victoria Cabrera. Zona Arqueológica, 7. Vol I, pp. 578-597.
Jordá Pardo, J.F., Aura Tortosa, J.E. (2009): “El Límite Pleistoceno-Holoceno en el yacimiento arqueológico de la Cueva de Nerja: nuevas aportaciones cronoestratigráficas y paleoclimáticas”, Geogaceta, 46, pp. 95-98.
Jordá Pardo, J. F., Aura Tortosa, J. E., Jordá Cerdá, F. (1999): “El límite Pleistoceno Holoceno en el yacimiento de la Cueva de Nerja (Málaga)”, Geogaceta, 8, pp. 102-104.
Jordá Pardo, J. F., Carral López, P., Ripoll López, S., Muñoz Ibáñez, F. J. (2012): “Geoarqueología, radiocarbono y cronoestratigrafía del yacimiento Solutrense de La Cueva de Ambrosio (Vélez-Blanco, Almería, España)”, Espacio, Tiempo y Forma. Serie I, Nueva época, Prehistoria y Arqueología, 5, pp. 63-74.
Lombera Hermida, A. de, Álvarez, X.-P., Rabuñal Gayo, X., Ameijenda Iglesias, A., Martínez Gómez, F., Soares Remiseiro, M., Pérez Alberti, A., Fábregas Valcarce, R. (2013): “El yacimiento de Valverde (Monforte de Lemos, Lugo, Galicia, España) y las primeras evidencias de poblamiento en el Pleniglaciar del NO de la Península Ibérica” Espacio Tiempo y Forma. Serie I, Prehistoria y Arqueología, 1(5)…
Lucena, A., Martínez, S., Angelucci, D. E., Badal, E., Villaverde, V., Zapata, J., Zilhão, J. (2013): “La ocupación solutrense del abrigo de La Boja (Mula, Murcia, España)”, Espacio Tiempo y Forma. Serie I, Prehistoria y Arqueología, 1(5), pp. 447-454.
Maíllo Fernández, J. M., Valladas, H., Cabrera Valdés, V., Bernardo de Quirós, F. (2001): “Nuevas dataciones para el Paleolítico superior de Cueva Morín (Villanueva de Villaescusa, Cantabria)”, Espacio Tiempo y Forma. Serie I, Prehistoria y Arqueología, 14, pp. 145-150.
Manne, T., Cascalheira, J., Évora, M., Marreiros, J., Bicho, N. (2012): “Intensive subsistence practices at Vale Boi, an Upper Paleolithic site in southwestern Portugal”, Quaternary International, 264, pp. 83-99. https://doi.org/10.1016/j.quaint.2012.02.026
Mangado, X., Mercadal, O., Fullola, J.M., Grimao, J. (2009): “Montlleó: un punt clau en la travessa humana del Pirineu”. In J.M. Fullola, N. Valdeyron (Eds.), Els Pirineus i les àrees circundants durant el Tardiglacial. Mutacions i Filiacions. XIV Colloqui Internacional d’Arqueologia de Puigcerdà. Homenatge al Prof. Georges Laplace, Institu d’Estudis Ceretans, Puigcerdà, pp. 549-564.
Mangado, X., Tejero, J.M., Fullola, J.M., Petit, M.A., García-Argüelles, P., García, M., Soler, N., Vaquero, M. (2010): “Nuevos territorios, nuevos grafismos: una visión del Paleolítico superior en Catalunya a inicios del siglo XXI”. In Mangado (Ed.), El Paleolítico superior peninsular. Novedades del siglo XXI, SERP, Universitat de Barcelona, Barcelona, pp. 63-83.
Menéndez, M. (1999): “La Cueva del Buxu. Cangas de Onís. Campaña de 1998 y resumen de los trabajos anteriores”. In Excavaciones arqueológicas en Asturias: 1995-98, Servicio de Publicaciones, pp. 69-73.
Mir, A., Salas, R. (2000): “La cueva de la Fuente del Trucho y su industria lítica arcaizante del Pleniglacial superior (Colungo, Huesca)”, Bolskan, 17, pp. 9-32.
Montes, L., Utrilla, P. (2008): “Le Paléolithique Supérieur dans la moyenne Vallée de l’Ebre”, L'Anthropologie, 112 (2), pp. 168-181. https://doi.org/10.1016/j.anthro.2008.02.005
Mora, R., Benito‐Calvo, A., Martínez‐Moreno, J., Marcén, P. G., Torre, I. de la (2011): “Chrono‐stratigraphy of the Upper Pleistocene and Holocene archaeological sequence in Cova Gran (south‐eastern Pre‐Pyrenees, Iberian Peninsula)”, Journal of Quaternary Science, 26(6), pp. 635-644. https://doi.org/10.1002/jqs.1486
Muñoz Amilibia, A.M.( 1967): “La cronología de radiocarbono en la Península Ibérica”, Pyrenae, 3, pp. 7-15.
Peñalver Iribarren, X., Múgica Alustiza, J. A. (2003): “Suelo de ocupación magdaleniense en la cueva de Praile Aitz I (Deba, Gipuzkoa): evidencias de arte mobiliar”, VELEIA, 20, 157-181.
Pettitt, Plicht, V., Ramsey, C., Soares, A., Zilhão, J. (2002): “The radiocarbon chronology”. In Zilhão, J., Trinkaus, E. (eds.) Portrait of the artist as a child. The Gravettian human skeleton from the Abrigo do Lagar Velho and its archaeological context, Portuguese Institute of Archaeology, Lisbon, pp. 132-138.
Rasines del Río, P., Montes Barquín, R., Lasheras Corruchaga, J. A., Muñoz Fernández, E., Heras Martín, C. de las, Fatás Monforte, P. (2009): ““Los tiempos de Altamira”: Un proyecto de investigación de la Cueva de Altamira y su entorno paleolítico”. In Medio siglo de arqueología en el Cantábrico Oriental y su Entorno: actas del Congreso Internacional, Instituto Alavés de Arqueología, pp. 709-728.
Ríos Garaizar, J., Gárate Maidagán, D. (2012): “Dataciones de radiocarbóno en el yacimiento de Askondo (Mañaria, Bizkaia)”, Kobie. Excavaciones Arqueológicas en Bizkaia, 2, pp. 39-44.
Rios-Garaizar, J., Gárate Maidagán, D., Gómez Olivencia, A., Arceredillo Alonso, D., Iriarte Avilés, E., García Moreno, A., Garrido Pimentel, D., San Pedro Calleja, Z. (2013): “El final del Solutrense en el Oriente Cantábrico a través de las ocupaciones de la Cueva de Arlanpe (Lemoa, Vizcaya)”, Zephyrus: Revista de prehistoria y arqueología, 72, pp. 15-38.
Ripoll López, S., Muñoz Ibáñez, F.J., Jordá Pardo, J.F., Martín-Lerma, I. (2013): “Historia de las investigaciones recientes en La Cueva de Ambrosio (Vélez-Blanco, Almería, España)”, Espacio Tiempo y Forma. Serie I, Prehistoria y Arqueología, 1(5), pp. 47-61.
Román Monroig, D., Villaverde Bonilla, V. (2014): “Dos retocadores solutrenses de la Cova de les Cendres (Teulada-Moraira, La Marina Alta, País Valenciano)”, Archivo de Prehistoria Levantina, 30, pp. 17-25.
Sanchidrián Torti, J.L., Márquez Alcántara, A.M. (2003): “Radiodataciones y sus repercusiones en el arte prehistórico malagueño”, Mainake, 25, pp. 275-292.
Straus, L. G. (1991): “Southwestern Europe at the last glacial maximum”, Current Anthropology, 32(2), pp. 189-199.
Straus, L. G., Altuna, J., Clark, G. A., Morales, M. G., Laville, H., Arl. Leroi-Gourhan, Menéndez de la Hoz, M., Ortea, J.A., Bahn, P., Clottes, J., Davidson, I., Farrand, W.r., García-Guinea, M.A., Gómez-Tabanaera, J.A., González-Echegaray, J, Goodyear, A.C., Rigaud, J. P. (1981): “Paleoecology at La Riera (Asturias, Spain)[and comments and reply]”, Current Anthropology, 22(6), pp. 655-682.
Straus, L.G., Bernaldo de Quirós, F., Cabrera Valdés, V., Clark, G.A. (1978): “Solutrean chronology and lithic variability in Vasco-Cantabrian Spain”, Zephyrus, XXVIII-XXIX, pp. 109-112.
Straus, L. G., Bernaldo de Quiros, F., Cabrera, V., Clark, G. A. (1977): “New radiocarbon dates for the Spanish Solutrean”, Antiquity, 51(203), p. 243.
L.G. Straus, G.A. Clark (Eds.) (1986): La Riera Cave. Stone Age Hunter–Gatherer Adaptations in Northern Spain, Anthropological Research Papers, vol. 36, Arizona State University, Tempe.
Straus, L.G., Clark, G.A., Altuna, J., González, M., Laville, H., Leroi-Gourhan, A., Menéndez de la Hoz, M., Ortea, J. (1983): “Excavaciones en la Cueva de la Riera (1976-1979): Un estudio inicial”, Trabajos de Prehistoria, 40(1), pp. 9-58.
Straus, L.G., González-Morales, M.R. (2007): “Further radiocarbon dates for the upper paleolithic of El Mirón Cave (Ramales de la Victoria, Cantabria, Spain)”, Radiocarbon, 49(3), pp. 1205-1214. https://doi.org/10.1017/S0033822200043113
Straus, L.G., González-Morales, M.R., Fontes, L.M. (2014): “Initial Magdalenian artifact assemblages in El Mirón Cave (Ramales de la Victoria, Cantabria, Spain): A preliminary report”, Zephyrus, 73, pp. 45-65.
Straus, L. G., González Morales, M. R., Stewart, E. B. (2008): “Early Magdalenian variability: new evidence from El Mirón Cave, Cantabria, Spain”, Journal of Field Archaeology, 33(2), pp. 197-218. https://doi.org/10.1179/009346908791071321
Stuart, A. J., Sulerzhitsky, L. D., Orlova, L. A., Kuzmin, Y. V., Lister, A. M. (2002): “The latest woolly mammoths (Mammuthus primigenius Blumenbach) in Europe and Asia: a review of the current evidence”, Quaternary Science Reviews, 21(14-15), 1559-1569. https://doi.org/10.1016/S0277-3791(02)00026-4
Soler, B., Badal, E., VIllaverde, V., Aura, J.E. (1990): “Notas sobre un hogar Solútreo-gravetiense del Abric de la Ratlla del bubo (Crevillent, Alacant)”, Archivo de Prehistoria Levantina, XX, pp. 79-94.
Tapias, F., López Recio, M., Manzano, I., Alcaraz, M., Morín, J., Sesé, C., Dapena, L., Alarcón, A., Yravedra, Arteaga, C. (2012): “Geoarqueología y paleontología de los depósitos de Pleistoceno Superior del antiguo Arroyo Abroñigal (Cuenca de Manzanares, Madrid): el yacimiento de Puente de los Tres Ojos”, Cuaternario y geomorfología, 26 (1-2), pp. 105-132.
Utrilla, P., Domingo, R., Montes, L., Mazo, C., Rodanés, J. M., Blasco, F., Alday, A. (2012): “The Ebro Basin in NE Spain: a crossroads during the Magdalenian”, Quaternary International, 272, pp. 88-104. https://doi.org/10.1016/j.quaint.2012.04.024
Uzquiano, P. (2014): “Wood resource exploitation by Cantabrian Late Upper Palaeolithic groups (N Spain) regarding MIS 2 vegetation dynamics”, Quaternary International, 337, pp. 154-162. https://doi.org/10.1016/j.quaint.2013.02.022
Valladas, H., Cachier, H., Maurice, P., Bernaldo de Quirós, F., Clottes, J., Cabrera Valdés, V., Uzquiano, P. Arnold, M. (1992): “Direct radiocarbon dates for prehistoric paintings at the Altamira, El Castillo and Niaux caves”, Nature, 357, pp. 68-70. https://doi.org/10.1038/357068a0
Villaverde Bonilla, V., Menargues, J., Badal, E., Guillerm, P.M., Martínez Valle, R. M., García, R. (1999): “El Paleolítico superior de la Cova de les Cendres (Teulada, Moraira). Datos proporcionados por el sondeo efectuado en los cuadros A/B 17”, Archivo de Prehistoria Levantina, XXIII, pp. 9-66.
Yravedra Sáinz de los Terreros, J. (2010): “Zooarqueología y tafonomía del yacimiento de Hornos de la Peña (San Felices de Buelna, Cantabria)”, Complutum, 21 (1), pp. 69-87.
Zilhão, J. (1997): O Paleolítico Superior da Estremadura portuguesa, Lisboa, Colibri, 2 vols.
Zilhão, J., Angelucci, D., Badal, E., Lucena, A., Martín, I., Martínez, S., Villaverde, V., Zapata, J. (2010): “Dos abrigos del paleolítico superior en Rambla Perea (Mula, Murcia)”. In Mangado, X. (ed.) El Paleolítico superior peninsular. Novedades del siglo XXI, pp. 137-148.
