# Supplementary material for: First modern human settlement recorded in the Iberian hinterland occurred during Heinrich Stadial 2 within harsh environmental conditions
Source: Sci Rep. 2021 Jul 26;11:15161. doi: 10.1038/s41598-021-94408-w (PMC8313528; doi:10.1038/s41598-021-94408-w)
Supplement: Supplementary file 5 — Supplementary Dataset 5. [file 41598_2021_94408_MOESM5_ESM.xlsx]

## Sheet: Level 1
Dataset 5 - Technological study of lithic assemblges
Chaîne opératoire phase	Technological category	Product	Flint	Quartz	Quartzite	Rock cristal	TOTAL	%	% (+ débris)
Phase 0. Catchment							0	0	0
	0.1 Unmodified blocks						0	0	0
Phase 1. Initialisation			3	0	2	1	6	0.0156658	0.0104167
	1.1. Decortication		2	0	2	1	5	0.0130548	0.00868056
		Entame (I)					0	0	0
		Cortical flake (100-50%) (II)			2	1	3	0.0078329	0.00520833
		Partially cortical flake (50-25%) (III)	2				2	0.00522193	0.00347222
		Cortical blade (100-50%) (II)					0	0	0
		Partially cortical blade (50-25%) (III)					0	0	0
	1.2 Preparation		1	0	0	0	1	0.00261097	0.00173611
		Bifacial crested blade					0	0	0
		Unifacial crested blade	1				1	0.00261097	0.00173611
		Semicrested blade					0	0	0
		Crest preparation flake					0	0	0
Phase 2. Exploitation			232	78	19	2	331	0.86423	*
Phase 2 + Débris			240	256	25	3	524	*	0.909722
	2.1. Raw blanks		179	29	18	2	228	0.5953	0.395833
		Flake with marginal cortex (0-25%) (IV)	3		3		6	0.0156658	0.0104167
		Flake	10	4	3		17	0.0443864	0.0295139
		Fragment of cortical flake	5	2	4		11	0.0287206	0.0190972
		Flake fragment	36	20	7	2	65	0.169713	0.112847
		Small flake (<2 cm)	37		1		38	0.0992167	0.0659722
		Small flake fragment	52	2			54	0.140992	0.09375
		Blade with marginal cortex (0-25%) (IV)	1				1	0.00261097	0.00173611
		Blade	1	1			2	0.00261097	0.00347222
		Fragment of cortical blade	2				2	0.00522193	0.00347222
		Blade fragment	15				15	0.0391645	0.0260417
		Bladelet (<2 cm)	3				3	0.0078329	0.00520833
		Bladelet fragment	14				14	0.0365535	0.0243056
	2.2. Core maintenance by-products		2	0	0	0	2	0.00522193	0.00347222
		Core flank	1				1	0.00261097	0.00173611
		Tablet					0	0	0
		Semi-tablet					0	0	0
		Platform overhang flake	1				1	0.00261097	0.00173611
		Distal maintenance flake					0	0	0
		Neo-crested blade					0	0	0
	2.3. Bifacil reduction products		48	0	0	0	48	0.125326	0.0833333
		Thinning flake	17				17	0.0443864	0.0295139
		Fragment of thinning flake	31				31	0.0809399	0.0538194
	2.4. Knapping waste		0	49	0	0	49	0.127937	*
	Including débris		8	227	6	1	242	*	0.420139
		Chunk		49			49	0.127937	0.0850694
		*Débris	8	178	6	1	193	*	0.335069
	2.5. Cores		3	0	1	0	4	0.0104439	0.00694444
		Blade core	1				1	0.00261097	0.00173611
		Flake core	2		1		3	0.0078329	0.00520833
Phase 3. Consumption and abandonment			45	0	0	1	46	0.120104	0.0798611
	3.1.Retouched blanks		21	0	0	1	22	0.0574413	0.0381944
		Endscraper	3				3	0.0078329	0.00520833
		Borer					0	0	0
		Burin	1?				0	0	0
		Truncation					0	0	0
		Backed piece					0	0	0
		Piece with continuous retouch on one edge	2				2	0.00522193	0.00347222
		Foliate point	7				7	0.0182768	0.0121528
		Notch	1				1	0.00261097	0.00173611
		Denticulate	1			1	2	0.00522193	0.00347222
		Écaille (scaled piece)	5				5	0.0130548	0.00868056
		Sidescraper					0	0	0
		Backed bladelet					0	0	0
		Other	2				2	0.00522193	0.00347222
		Burin-endscraper					0	0	0
	3.2. Exhausted cores		0	0	0	0	0	0	0
		Blade core					0	0	0
		Flake core					0	0	0
	3.3. Tool maintenance by-products		24	0	0	0	24	0.0626632	0.0416667
		Retouch thinning flake	11				11	0.0287206	0.0190972
		Fragment of retouch thinning flake	12				12	0.0313316	0.0208333
		Retouch flake					0	0	0
		Burin spall	1				1	0.00261097	0.00173611
TOTAL			280	78	21	4	383	1
%			0.73107	0.203655	0.0548303	0.0104439	1
TOTAL (+ débris)			288	256	27	5	576		1
% (+ débris)			0.5	0.444444	0.046875	0.00868056	1

## Sheet: Level 2a
Chaîne opératoire phase	Technological category	Product	Flint	Quartz	Quartzite	Rock cristal	TOTAL	%	% (+ débris)
Phase 0. Catchment			0	0	0	0	0	0	0
	0.1 Unmodified blocks						0	0	0
Phase 1. Initialisation			7	0	9	0	16	0.0407125	0.0207523
	1.1. Decortication		7	0	9	0	16	0.0407125	0.0207523
		Entame (I)			3		3	0.00763359	0.00389105
		Cortical flake (100-50%) (II)	5		6		11	0.0279898	0.0142672
		Partially cortical flake (50-25%) (III)	1				1	0.00254453	0.00129702
		Cortical blade (100-50%) (II)					0	0	0
		Partially cortical blade (50-25%) (III)	1				1	0.00254453	0.00129702
	1.2 Preparation		0	0	0	0	0	0	0
		Bifacial crested blade					0	0	0
		Unifacial crested blade					0	0	0
		Semicrested blade					0	0	0
		Crest preparation flake					0	0	0
Phase 2. Exploitation			164	106	29	12	311	0.791349	*
Phase 2 + Débris			167	473	32	17	689	*	0.893645
	2.1. Raw blanks		115	32	21	10	178	0.452926	0.230869
		Flake with marginal cortex (0-25%) (IV)	3	1	2		6	0.0152672	0.0077821
		Flake	6	6	3	1	16	0.0407125	0.0207523
		Fragment of cortical flake	20	16	5	5	46	0.117048	0.0596628
		Flake fragment	7	2	6	1	16	0.0407125	0.0207523
		Small flake (<2 cm)	23	5	2		30	0.0763359	0.0389105
		Small flake fragment	39	2	2	1	44	0.111959	0.0570687
		Blade with marginal cortex (0-25%) (IV)			1		1	0.00254453	0.00129702
		Blade	1				1	0.00254453	0.00129702
		Fragment of cortical blade	2				2	0.00508906	0.00259403
		Blade fragment	7			1	8	0.0203562	0.0103761
		Bladelet (<2 cm)	2				2	0.00508906	0.00259403
		Bladelet fragment	5			1	6	0.0152672	0.0077821
	2.2. Core maintenance by-products		1	0	0	0	1	0.00254453	0.00129702
		Core flank	1				1	0.00254453	0.00129702
		Tablet					0	0	0
		Semi-tablet					0	0	0
		Platform overhang flake					0	0	0
		Distal maintenance flake					0	0	0
		Neo-crested blade					0	0	0
	2.3. Bifacil reduction products		48	0	0	0	48	0.122137	0.0622568
		Thinning flake	21				21	0.0534351	0.0272374
		Fragment of thinning flake	27				27	0.0687023	0.0350195
	2.4. Knapping waste		0	74	8	1	83	0.211196	*
	Including débris		3	441	11	6	461	*	0.597925
		Chunk		74	8	1	83	0.211196	0.107652
		*Débris	3	367	3	5	378	*	0.490272
	2.5. Cores		0	0	0	1	1	0.00254453	0.00129702
		Blade core				1	1	0.00254453	0.00129702
		Flake core					0	0	0
Phase 3. Consumption and abandonment			66	0	0	0	66	0.167939	0.0856031
	3.1.Retouched blanks		32	0	0	0	32	0.0814249	0.0415045
		Endscraper	5				5	0.0127226	0.00648508
		Borer					0	0	0
		Burin	2				2	0.00508906	0.00259403
		Truncation					0	0	0
		Backed piece					0	0	0
		Piece with continuous retouch on one edge	2				2	0.00508906	0.00259403
		Foliate point	14				14	0.0356234	0.0181582
		Notch					0	0	0
		Denticulate	1				1	0.00254453	0.00129702
		Écaille (scaled piece)	4				4	0.0101781	0.00518807
		Sidescraper					0	0	0
		Backed bladelet					0	0	0
		Other	4				4	0.0101781	0.00518807
		Burin-endscraper					0	0	0
	3.2. Exhausted cores		0	0	0	0	0	0	0
		Blade core					0	0	0
		Flake core					0	0	0
	3.3. Tool maintenance by-products		34	0	0	0	34	0.086514	0.0440986
		Retouch thinning flake	16				16	0.0407125	0.0207523
		Fragment of retouch thinning flake	18				18	0.0458015	0.0233463
		Retouch flake					0	0	0
		Burin spall					0	0	0
TOTAL			237	106	38	12	393	1
%			0.603053	0.26972	0.0966921	0.0305344	1
TOTAL (+ débris)			240	473	41	17	771		1
% (+ débris)			0.311284	0.613489	0.0531777	0.0220493	1

## Sheet: Level 2b
Chaîne opératoire phase	Technological category	Product	Flint	Quartz	Quartzite	Rock cristal	TOTAL	%	% (+ débris)
Phase 0. Catchment			0	0	0	0	0	0	0
	0.1 Unmodified blocks						0	0	0
Phase 1. Initialisation			10	1	8	1	20	0.0138696	0.00792079
	1.1. Decortication		10	1	8	1	20	0.0138696	0.00792079
		Entame (I)					0	0	0
		Cortical flake (100-50%) (II)	6	1	8	1	16	0.0110957	0.00633663
		Partially cortical flake (50-25%) (III)	4				4	0.00277393	0.00158416
		Cortical blade (100-50%) (II)						0	0
		Partially cortical blade (50-25%) (III)					0	0	0
	1.2 Preparation		0	0	0	0	0	0	0
		Bifacial crested blade					0	0	0
		Unifacial crested blade					0	0	0
		Semicrested blade					0	0	0
		Crest preparation flake					0	0	0
Phase 2. Exploitation			927	250	30	49	1256	0.871012	*
Phase 2 + Débris			944	1286	31	78	2339	*	0.926337
	2.1. Raw blanks		775	54	19	41	889	0.616505	0.352079
		Flake with marginal cortex (0-25%) (IV)	10	6	3	1	20	0.0138696	0.00792079
		Flake	45	19	3		67	0.0464632	0.0265347
		Fragment of cortical flake	7	6	5	1	19	0.0131761	0.00752475
		Flake fragment	103	16	3	6	128	0.0887656	0.0506931
		Small flake (<2 cm)	158	5	1	5	169	0.117198	0.0669307
		Small flake fragment	389	1	2	25	417	0.289182	0.165149
		Blade with marginal cortex (0-25%) (IV)	3		1		4	0.00277393	0.00158416
		Blade	4				4	0.00277393	0.00158416
		Fragment of cortical blade	4				4	0.00277393	0.00158416
		Blade fragment	24	1			25	0.017337	0.00990099
		Bladelet (<2 cm)	8		1	1	10	0.00693481	0.0039604
		Bladelet fragment	20			2	22	0.0152566	0.00871287
	2.2. Core maintenance by-products		4	0	0	0	4	0.00277393	0.00158416
		Core flank	2				2	0.00138696	0.000792079
		Tablet					0	0	0
		Semi-tablet	2				2	0.00138696	0.000792079
		Platform overhang flake					0	0	0
		Distal maintenance flake					0	0	0
		Neo-crested blade					0	0	0
	2.3. Bifacil reduction products		143	0	0	1	144	0.0998613	0.0570297
		Thinning flake	66				66	0.0457698	0.0261386
		Fragment of thinning flake	77			1	78	0.0540915	0.0308911
	2.4. Knapping waste		4	195	10	4	213	0.147712	*
	Including débris		21	1231	11	33	1296	*	0.513267
		Chunk	4	195	10	4	213	0.147712	0.0843564
		*Débris	17	1036	1	29	1083	*	0.428911
	2.5. Cores		1	1	1	3	6	0.00416089	0.00237624
		Blade core	1				1	0.000693481	0.00039604
		Flake core		1	1	3	5	0.00346741	0.0019802
Phase 3. Consumption and abandonment			165	0	1	0	166	0.115118	0.0657426
	3.1.Retouched blanks		71	0	0	0	71	0.0492372	0.0281188
		Endscraper	14				14	0.00970874	0.00554455
		Borer					0	0	0
		Burin	5				5	0.00346741	0.0019802
		Truncation	2				2	0.00138696	0.000792079
		Backed piece	1				1	0.000693481	0.00039604
		Piece with continuous retouch on one edge	3				3	0.00208044	0.00118812
		Foliate point	26				26	0.0180305	0.010297
		Notch					0	0	0
		Denticulate					0	0	0
		Écaille (scaled piece)	16				16	0.0110957	0.00633663
		Sidescraper					0	0	0
		Backed bladelet	2				2	0.00138696	0.000792079
		Other	1				1	0.000693481	0.00039604
		Burin-endscraper	1				1	0.000693481	0.00039604
	3.2. Exhausted cores		3	0	1	0	4	0.00277393	0.00158416
		Blade core	1				1	0.000693481	0.00039604
		Flake core	2		1		3	0.00208044	0.00118812
	3.3. Tool maintenance by-products		91	0	0	0	91	0.0631068	0.0360396
		Retouch thinning flake	36				36	0.0249653	0.0142574
		Fragment of retouch thinning flake	48				48	0.0332871	0.0190099
		Retouch flake	4				4	0.00277393	0.00158416
		Burin spall	3				3	0.00208044	0.00118812
TOTAL			1102	251	39	50	1442	1
%			0.764216	0.174064	0.0270458	0.0346741	1
TOTAL (+ débris)			1119	1287	40	79	2525		1
% (+ débris)			0.443168	0.509703	0.0158416	0.0312871	1

## Sheet: Level 3
Chaîne opératoire phase	Technological category	Product	Flint	Quartz	Quartzite	Rock cristal	TOTAL	%	% (+ débris)
Phase 0. Catchment			0	0	0	0	0	0	0
	0.1 Unmodified blocks						0	0	0
Phase 1. Initialisation			3	0	1	0	4	0.00627943	0.00354296
	1.1. Decortication		3	0	1	0	4	0.00627943	0.00354296
		Entame (I)					0	0	0
		Cortical flake (100-50%) (II)	2				2	0.00313972	0.00177148
		Partially cortical flake (50-25%) (III)	1		1		2	0.00313972	0.00177148
		Cortical blade (100-50%) (II)					0	0	0
		Partially cortical blade (50-25%) (III)					0	0	0
	1.2 Preparation		0	0	0	0	0	0	0
		Bifacial crested blade					0	0	0
		Unifacial crested blade					0	0	0
		Semicrested blade					0	0	0
		Crest preparation flake					0	0	0
Phase 2. Exploitation			408	87	13	80	588	0.923077	*
Phase 2 + Débris			461	485	16	118	1080	*	0.956599
	2.1. Raw blanks		394	31	10	80	515	0.808477	0.456156
		Flake with marginal cortex (0-25%) (IV)	6				6	0.00941915	0.00531444
		Flake	9	7	2	5	23	0.0361068	0.020372
		Fragment of cortical flake	14		1		15	0.0235479	0.0132861
		Flake fragment	16	6	5	6	33	0.0518053	0.0292294
		Small flake (<2 cm)	136	10	1	26	173	0.271586	0.153233
		Small flake fragment	179	8		30	217	0.340659	0.192205
		Blade with marginal cortex (0-25%) (IV)					0	0	0
		Blade					0	0	0
		Fragment of cortical blade	2				2	0.00313972	0.00177148
		Blade fragment	5				5	0.00784929	0.0044287
		Bladelet (<2 cm)	4			4	8	0.0125589	0.00708592
		Bladelet fragment	23		1	9	33	0.0518053	0.0292294
	2.2. Core maintenance by-products		1	0	0	0	1	0.00156986	0.00088574
		Core flank					0	0	0
		Tablet					0	0	0
		Semi-tablet					0	0	0
		Platform overhang flake					0	0	0
		Distal maintenance flake	1				1	0.00156986	0.00088574
		Neo-crested blade					0	0	0
	2.3. Bifacil reduction products		12	0	0	0	12	0.0188383	0.0106289
		Thinning flake	7				7	0.010989	0.00620018
		Fragment of thinning flake	5				5	0.00784929	0.0044287
	2.4. Knapping waste		0	55	3	0	58	0.0910518	*
	Including débris		53	453	6	38	550	*	0.487157
		Chunk		55	3		58	0.0910518	0.0513729
		*Débris	53	398	3	38	492	*	0.435784
	2.5. Cores		1	1	0	0	2	0.00313972	0.00177148
		Blade core	1				1	0.00156986	0.00088574
		Flake core		1			1	0.00156986	0.00088574
Phase 3. Consumption and abandonment			45	0	0	0	45	0.0706436	0.0398583
	3.1.Retouched blanks		13	0	0	0	13	0.0204082	0.0115146
		Endscraper	6				6	0.00941915	0.00531444
		Borer					0	0	0
		Burin					0	0	0
		Truncation					0	0	0
		Backed piece					0	0	0
		Piece with continuous retouch on one edge	1				1	0.00156986	0.00088574
		Foliate point	3				3	0.00470958	0.00265722
		Notch					0	0	0
		Denticulate	2				2	0.00313972	0.00177148
		Écaille (scaled piece)	1				1	0.00156986	0.00088574
		Sidescraper					0	0	0
		Backed bladelet					0	0	0
		Other					0	0	0
		Burin-endscraper					0	0	0
	3.2. Exhausted cores		1	0	0	0	1	0.00156986	0.00088574
		Blade core	1				1	0.00156986	0.00088574
		Flake core					0	0	0
	3.3. Tool maintenance by-products		31	0	0	0	31	0.0486656	0.0274579
		Retouch thinning flake	14				14	0.021978	0.0124004
		Fragment of retouch thinning flake	17				17	0.0266876	0.0150576
		Retouch flake					0	0	0
		Burin spall					0	0	0
TOTAL			456	87	14	80	637	1
%			0.715856	0.136578	0.021978	0.125589	1
TOTAL (+ débris)			509	485	17	118	1129		1
% (+ débris)			0.450841	0.429584	0.0150576	0.104517	1

## Sheet: Level 4
Chaîne opératoire phase	Technological category	Product	Flint	Quartz	Quartzite	Rock cristal	TOTAL	%	% (+ débris)
Phase 0. Catchment			0	0	0	0	0	0	0
	0.1 Unmodified blocks						0	0	0
Phase 1. Initialisation			1	1	0	0	2	0.0206186	0.0101523
	1.1. Decortication		1	1	0	0	2	0.0206186	0.0101523
		Entame (I)					0	0	0
		Cortical flake (100-50%) (II)					0	0	0
		Partially cortical flake (50-25%) (III)	1	1			2	0.0206186	0.0101523
		Cortical blade (100-50%) (II)					0	0	0
		Partially cortical blade (50-25%) (III)					0	0	0
	1.2 Preparation		0	0	0	0	0	0	0
		Bifacial crested blade					0	0	0
		Unifacial crested blade					0	0	0
		Semicrested blade					0	0	0
		Crest preparation flake					0	0	0
Phase 2. Exploitation			56	24	3	7	90	0.927835	*
Phase 2 + Débris			57	104	8	21	190	*	0.964467
	2.1. Raw blanks		52	2	2	7	63	0.649485	0.319797
		Flake with marginal cortex (0-25%) (IV)					0	0	0
		Flake	1	1	1		3	0.0309278	0.0152284
		Fragment of cortical flake					0	0	0
		Flake fragment	4		1	4	9	0.0927835	0.0456853
		Small flake (<2 cm)	17			2	19	0.195876	0.0964467
		Small flake fragment	27			1	28	0.28866	0.142132
		Blade with marginal cortex (0-25%) (IV)					0	0	0
		Blade	1	1			2	0.0103093	0.0101523
		Fragment of cortical blade					0	0	0
		Blade fragment					0	0	0
		Bladelet (<2 cm)	2				2	0.0206186	0.0101523
		Bladelet fragment					0	0	0
	2.2. Core maintenance by-products		0	0	0	0	0	0	0
		Core flank					0	0	0
		Tablet					0	0	0
		Semi-tablet					0	0	0
		Platform overhang flake					0	0	0
		Distal maintenance flake					0	0	0
		Neo-crested blade					0	0	0
	2.3. Bifacil reduction products		4	0	0	0	4	0.0412371	0.0203046
		Thinning flake					0	0	0
		Fragment of thinning flake	4				4	0.0412371	0.0203046
	2.4. Knapping waste		0	22	1	0	23	0.237113	*
	Including débris		1	102	6	14	123	*	0.624365
		Chunk		22	1		23	0.237113	0.116751
		*Débris	1	80	5	14	100	*	0.507614
	2.5. Cores		0	0	0	0	0	0	0
		Blade core					0	0	0
		Flake core					0	0	0
Phase 3. Consumption and abandonment			5	0	0	0	5	0.0515464	0.0253807
	3.1.Retouched blanks		5	0	0	0	5	0.0515464	0.0253807
		Endscraper	2				2	0.0206186	0.0101523
		Borer					0	0	0
		Burin					0	0	0
		Truncation					0	0	0
		Backed piece					0	0	0
		Piece with continuous retouch on one edge	1				1	0.0103093	0.00507614
		Foliate point					0	0	0
		Notch					0	0	0
		Denticulate	1				1	0.0103093	0.00507614
		Écaille (scaled piece)	1				1	0.0103093	0.00507614
		Sidescraper					0	0	0
		Backed bladelet					0	0	0
		Other					0	0	0
		Burin-endscraper					0	0	0
	3.2. Exhausted cores		0	0	0	0	0	0	0
		Blade core					0	0	0
		Flake core					0	0	0
	3.3. Tool maintenance by-products		0	0	0	0	0	0	0
		Retouch thinning flake					0	0	0
		Fragment of retouch thinning flake					0	0	0
		Retouch flake					0	0	0
		Burin spall					0	0	0
TOTAL			62	25	3	7	97	1
%			0.639175	0.257732	0.0309278	0.0721649	1
TOTAL (+ débris)			63	105	8	21	197		1
% (+ débris)			0.319797	0.532995	0.0406091	0.106599	1

## Sheet: Level 5
Chaîne opératoire phase	Technological category	Product	Flint	Quartz	Quartzite	Rock cristal	TOTAL	%	% (+ débris)
Phase 0. Catchment			0	0	0	0	0	0	0
	0.1 Unmodified blocks						0	0	0
Phase 1. Initialisation			1	0	0	0	1	0.00505051	0.0019802
	1.1. Decortication		1	0	0	0	1	0.00505051	0.0019802
		Entame (I)					0	0	0
		Cortical flake (100-50%) (II)	1				1	0.00505051	0.0019802
		Partially cortical flake (50-25%) (III)					0	0	0
		Cortical blade (100-50%) (II)					0	0	0
		Partially cortical blade (50-25%) (III)					0	0	0
	1.2 Preparation		0	0	0	0	0	0	0
		Bifacial crested blade					0	0	0
		Unifacial crested blade					0	0	0
		Semicrested blade					0	0	0
		Crest preparation flake					0	0	0
Phase 2. Exploitation			66	66	6	53	191	0.964646	*
Phase 2 + Débris			72	324	8	94	498	*	0.986139
	2.1. Raw blanks		66	16	5	53	140	0.707071	0.277228
		Flake with marginal cortex (0-25%) (IV)				1	1	0.00505051	0.0019802
		Flake	5	2			7	0.0353535	0.0138614
		Fragment of cortical flake	4				4	0.020202	0.00792079
		Flake fragment	4	3	2		9	0.0454545	0.0178218
		Small flake (<2 cm)	16	4		17	37	0.186869	0.0732673
		Small flake fragment	24	7	2	26	59	0.29798	0.116832
		Blade with marginal cortex (0-25%) (IV)					0	0	0
		Blade					0	0	0
		Fragment of cortical blade					0	0	0
		Blade fragment	1				1	0.00505051	0.0019802
		Bladelet (<2 cm)	2			1	3	0.0151515	0.00594059
		Bladelet fragment	10		1	8	19	0.0959596	0.0376238
	2.2. Core maintenance by-products		0	0	0	0	0	0	0
		Core flank					0	0	0
		Tablet					0	0	0
		Semi-tablet					0	0	0
		Platform overhang flake					0	0	0
		Distal maintenance flake					0	0	0
		Neo-crested blade					0	0	0
	2.3. Bifacil reduction products		0	0	0	0	0	0	0
		Thinning flake					0	0	0
		Fragment of thinning flake					0	0	0
	2.4. Knapping waste		0	48	1	0	49	0.247475	*
	Including débris		6	306	3	41	356	*	0.70495
		Chunk		48	1		49	0.247475	0.0970297
		*Débris	6	258	2	41	307	*	0.607921
	2.5. Cores		0	2	0	0	2	0.010101	0.0039604
		Blade core					0	0	0
		Flake core		2			2	0.010101	0.0039604
Phase 3. Consumption and abandonment			6	0	0	0	6	0.030303	0.0118812
	3.1.Retouched blanks		6	0	0	0	6	0.030303	0.0118812
		Endscraper	1				1	0.00505051	0.0019802
		Borer					0	0	0
		Burin					0	0	0
		Truncation					0	0	0
		Backed piece					0	0	0
		Piece with continuous retouch on one edge	1				1	0.00505051	0.0019802
		Foliate point					0	0	0
		Notch					0	0	0
		Denticulate					0	0	0
		Écaille (scaled piece)	2				2	0.010101	0.0039604
		Sidescraper					0	0	0
		Backed bladelet					0	0	0
		Other	2				2	0.010101	0.0039604
		Burin-endscraper					0	0	0
	3.2. Exhausted cores		0	0	0	0	0	0	0
		Blade core					0	0	0
		Flake core					0	0	0
	3.3. Tool maintenance by-products		0	0	0	0	0	0	0
		Retouch thinning flake					0	0	0
		Fragment of retouch thinning flake					0	0	0
		Retouch flake					0	0	0
		Burin spall					0	0	0
TOTAL			73	66	6	53	198	1
%			0.368687	0.333333	0.030303	0.267677	1
TOTAL (+ débris)			79	324	8	94	505		1
% (+ débris)			0.156436	0.641584	0.0158416	0.186139	1

## Sheet: Level 6
Chaîne opératoire phase	Technological category	Product	Flint	Quartz	Quartzite	Rock cristal	TOTAL	%	% (+ débris)
Phase 0. Catchment			0	0	0	0	0	0	0
	0.1 Unmodified blocks						0	0	0
Phase 1. Initialisation			0	0	0	0	0	0	0
	1.1. Decortication		0	0	0	0	0	0	0
		Entame (I)					0	0	0
		Cortical flake (100-50%) (II)					0	0	0
		Partially cortical flake (50-25%) (III)					0	0	0
		Cortical blade (100-50%) (II)					0	0	0
		Partially cortical blade (50-25%) (III)					0	0	0
	1.2 Preparation		0	0	0	0	0	0	0
		Bifacial crested blade					0	0	0
		Unifacial crested blade					0	0	0
		Semicrested blade					0	0	0
		Crest preparation flake					0	0	0
Phase 2. Exploitation			12	5	1	2	20	0.714286	*
Phase 2 + Débris			14	39	1	4	58	*	0.878788
	2.1. Raw blanks		12	2	1	2	17	0.607143	0.257576
		Flake with marginal cortex (0-25%) (IV)					0	0	0
		Flake					0	0	0
		Fragment of cortical flake	1				1	0.0357143	0.0151515
		Flake fragment	3	2			5	0.178571	0.0757576
		Small flake (<2 cm)	2				2	0.0714286	0.030303
		Small flake fragment	5		1	2	8	0.285714	0.121212
		Blade with marginal cortex (0-25%) (IV)					0	0	0
		Blade					0	0	0
		Fragment of cortical blade					0	0	0
		Blade fragment	1				1	0.0357143	0.0151515
		Bladelet (<2 cm)					0	0	0
		Bladelet fragment					0	0	0
	2.2. Core maintenance by-products		0	0	0	0	0	0	0
		Core flank					0	0	0
		Tablet					0	0	0
		Semi-tablet					0	0	0
		Platform overhang flake					0	0	0
		Distal maintenance flake					0	0	0
		Neo-crested blade					0	0	0
	2.3. Bifacil reduction products		0	0	0	0	0	0	0
		Thinning flake					0	0	0
		Fragment of thinning flake					0	0	0
	2.4. Knapping waste		0	3	0	0	3	0.107143	*
	Including débris		2	37	0	2	41	*	0.621212
		Chunk		3			3	0.107143	0.0454545
		*Débris	2	34		2	38	*	0.575758
	2.5. Cores		0	0	0	0	0	0	0
		Blade core					0	0	0
		Flake core					0	0	0
Phase 3. Consumption and abandonment			8	0	0	0	8	0.285714	0.121212
	3.1.Retouched blanks		1	0	0	0	1	0.0357143	0.0151515
		Endscraper					0	0	0
		Borer					0	0	0
		Burin					0	0	0
		Truncation					0	0	0
		Backed piece					0	0	0
		Piece with continuous retouch on one edge	1				1	0.0357143	0.0151515
		Foliate point					0	0	0
		Notch					0	0	0
		Denticulate					0	0	0
		Écaille (scaled piece)					0	0	0
		Sidescraper					0	0	0
		Backed bladelet					0	0	0
		Other					0	0	0
		Burin-endscraper					0	0	0
	3.2. Exhausted cores		0	0	0	0	0	0	0
		Blade core					0	0	0
		Flake core					0	0	0
	3.3. Tool maintenance by-products		7	0	0	0	7	0.25	0.106061
		Retouch thinning flake	6				6	0.214286	0.0909091
		Fragment of retouch thinning flake	1				1	0.0357143	0.0151515
		Retouch flake					0	0	0
		Burin spall					0	0	0
TOTAL			20	5	1	2	28	1
%			0.714286	0.178571	0.0357143	0.0714286	1
TOTAL (+ débris)			22	39	1	4	66		1
% (+ débris)			0.333333	0.590909	0.0151515	0.0606061	1
